# Supplementary material
Source: publisher site journal article supplement (https://www.dovepress.com/get_supplementary_file.php?f=443146.docx)
Supplement: Supplementary file 1 [file get_supplementary_file.php]

Table S1. Pearson's correlation analyses between MoCA and HAMA scores with

partial retinal neurovascular parameters.

|  | MoCA | | HAMA | |
| --- | --- | --- | --- | --- |
|  | r | p value | r | p value |
| Cup Area | 0.14 | 0.353 | 0.11 | 0.468 |
| Cup Volume | 0.25 | 0.105 | 0.17 | 0.254 |
| Disc Area | 0.05 | 0.753 | 0.08 | 0.572 |
| I-Hemi RNFL | 0.09 | 0.531 | 0.16 | 0.223 |

Abbreviations:

MoCA: Montreal Cognitive Assessment; HAMA: Hamilton Anxiety Scale; I-Hemi RNFL: the thickness of the retinal nerve fibre layer in the inferior-hemifield of the peri-disc.

Table S2. Comparison of retinal neurovascular parameters in female and male subjects separately.

|  | Female (n=87) | | |  | | Male (n=47) | | | |
| --- | --- | --- | --- | --- | --- | --- | --- | --- | --- |
|  | HCs (n=31) | MDD (n=56) | p value | |  | HCs (n=29) | MDD (n=18) | | p value |
| Retinal microvascular parameters | | | | |  |  |  | |  |
| DCP VD (%), mean(SD) | | |  | |  |  |  | |  |
| Whole Image | 55.30 (4.51) | 51.8 (5.05) | 0.002*** | |  | 53.39 (4.34) | 49.74 (4.62) | | 0.010*** |
| ParaFovea | 59.07 (2.57) | 56.80 (3.59) | 0.003*** | |  | 56.07 (3.40) | 54.21 (3.89) | | 0.096 |
| PeriFovea | 57.06 (4.84) | 53.00 (5.41) | 0.001*** | |  | 54.93 (4.62) | 51.18 (5.02) | | 0.013*** |
| Overall QI | 8.74 (0.58) | 8.16 (0.89) | <0.001*** | |  | 8.55 (0.40) | 8.06 (0.68) | | 0.038*** |
| Retinal neural parameters | | | | |  |  |  | |  |
| GCC, mean(SD) |  |  |  | |  |  |  | |  |
| Inner Retina Average | 99.73 (4.62) | 97.61 (6.11) | 0.106 | |  | 100.74 (6.92) | 96.55 (5.15) | | 0.039*** |
| Superior Avg | 99.81 (4.92) | 97.66 (6.75) | 0.134 | |  | 100.59 (7.63) | 96.39 (5.08) | | 0.053 |
| Inferior Avg | 99.67 (4.78) | 97.53 (5.90) | 0.096 | |  | 100.94 (6.70) | 96.74 (5.47) | | 0.037*** |
| GLV (media, IQR) | 0.88 (1.51) | 1.59 (2.13) | 0.104 | |  | 0.88 (2.03) | 2.06 (2.40) | | 0.062 |
| Avg SSIa | 79.27 (5.90) | 73.69 (6.75) | <0.001*** | |  | 79.72 (4.64) | 73.58 (6.43) | | <0.001*** |
| ONH, mean(SD) |  |  |  | |  |  |  | |  |
| V C-D ratio | 0.46 (0.17) | 0.52 (0.12) | 0.158 | |  | 0.46 (0.18) | 0.53 (0.12) | 0.115 | |
| Rim area | 1.56 (0.28) | 1.38 (0.34) | 0.019*** | |  | 1.54 (0.41) | 1.36 (0.27) | 0.086 | |
| Nervehead volume | 0.39 (0.15) | 0.30 (0.12) | 0.005*** | |  | 0.35 (0.16) | 0.30 (0.11) | 0.325 | |
| Inf RNFL | 108.06(10.19) | 104.03 (9.13) | 0.085 | |  | 104.67 (11.14) | 98.72 (8.31) | 0.080 | |
| Avg SSIb | 78.69 (6.36) | 75.90 (7.06) | 0.094 | |  | 76.30 (6.94) | 72.37 (7.88) | 0.105 | |

Abbreviations:

HCs: Healthy controls; MDD: major depressive disorder; VD: vessel density; DCP: deep capillary plexus; SD: standard deviation; Overall QI: overall quality index; GCC, ganglion cell complex; Avg: average; GLV: global loss volume; IQR: interquartile range; SSI: signal strength index; ONH: optic nerve head; V C-D ratio: vertical cup/disc ratio; Inf: inferior; RNFL:retinal nerve fibre layer;

a: signal strength index of GCC mode of OCTA image;

b: signal strength index of ONH mode of OCTA image;

*p<0.05 is considered statistically significant.

Table S3. Comparison of retinal neurovascular parameters of aged ≤40 years and >40 years subjects

separately.

|  | ≤40y (n=89) | | | >40y (n=45) | | | |
| --- | --- | --- | --- | --- | --- | --- | --- |
|  | HCs (n=36) | MDD (n=53) | p value | HCs (n=24) | | MDD (n=21) | P value | |
| Retinal microvascular parameters | | | | | | | | |
| DCP VD (%), mean (SD) | | | | | | | |
| Whole Image | 54.03 (4.49) | 51.23 (4.60) | 0.006*** | | 54.90 (4.54) | 51.54 (6.07) | 0.042* | |
| ParaFovea | 57.71 (3.53) | 56.31 (3.53) | 0.070 | | 57.50 (3.09) | 55.92 (4.52) | 0.176 | |
| PeriFovea | 55.57 (4.91) | 52.49 (5.01) | 0.005* | | 56.71 (4.67) | 52.82 (6.27) | 0.023* | |
| Overall QIa | 9.00 (1.00) | 8.00 (1.00) | 0.003* | | 9.00 (0.00) | 9.00 (2.00) | 0.075 | |
| Retinal neural parameters | | | | | | | | |
| GCC, mean (SD) |  |  |  | |  |  |  | |
| Inner Retina Average | 100.36 (4.09) | 97.98 (5.89) | 0.048* | | 100.00(7.66) | 96.59 (5.15) | 0.106 | |
| Superior Avg | 100.07 (4.59) | 98.01 (6.25) | 0.108 | | 100.32 (8.23) | 95.57 (6.55) | 0.048* | |
| Inferior Avg | 100.68 (4.17) | 97.91 (5.60) | 0.023* | | 99.69 (7.49) | 95.78 (5.06) | 0.059 | |
| GLV (media, IQR) | 0.90 (1.24) | 1.76 (2.69) | 0.012* | | 0.72 (2.86) | 2.01 (2.88) | 0.211 | |
| Avg SSIa | 77.72 (5.10) | 73.36 (6.59) | 0.002* | | 81.94 (4.63) | 74.51 (6.84) | <0.001* | |
| ONH |  |  |  | |  |  |  | |
| V C-D ratio | 0.45 (0.17) | 0.52 (0.12) | 0.158 | | 0.49 (0.18) | 0.51 (0.12) | 0.755 | |
| RimArea | 1.52 (0.36) | 1.40 (0.35) | 0.019* | | 1.62 (0.32) | 1.31 (0.20) | 0.002* | |
| Nervehead Volume | 0.37 (0.15) | 0.31 (0.12) | 0.005* | | 0.37 (0.17) | 0.28 (0.08) | 0.036* | |
| Inf RNFL | 106.08 (11.49) | 103.19 (9.09) | 0.085 | | 107.07(9.31) | 101.18(9.51) | 0.079 | |
| Avg SSIb | 76.52 (6.18) | 74.80 (7.34) | 0.271 | | 79.41 (7.36) | 75.58 (7.71) | 0.151 | |

Abbreviations:

HCs: Healthy controls; MDD: major depressive disorder; VD: vessel density; DCP: deep capillary plexus; SD: standard deviation; Overall QI: overall quality index; GCC, ganglion cell complex; Avg: average; GLV: global loss volume; IQR: interquartile range; SSI: signal strength index; ONH: optic nerve head; V C-D ratio: vertical cup/disc ratio; Inf: inferior; RNFL:retinal nerve fibre layer;

a: signal strength index of GCC mode of OCTA image;

b: signal strength index of ONH mode of OCTA image;

*p<0.05 is considered statistically significant.
